# Supplementary material for: 2D and 2.5D modeling of the piezometric surface of the Pan-African basement aquifers in the Sudano-Sahelian zone of Cameroon using the Kriging method
Source: Research Square preprint supplement (doi:10.21203/rs.3.rs-6225207/v1), 2025-06-06
Supplement: Supplementary file 1 [file 4304f5db8cfc76e5c8a1e707.docx]

**2D and 2.5D modeling of the piezometric surface of the Pan-African basement aquifers in the Sudano-Sahelian zone of Cameroon using the Kriging method**

Nana Oumarou Baba,1 Ewodo Mboudou Guillaume1 and Bon André Firmin2&3

1

Department of Hydraulics and Water Management, National Polytechnic School of Maroua, University of Maroua, Cameroon.

2

Department of Meteorology and Climatology, National Polytechnic School of Maroua, University of Maroua, Cameroon.

3

Department of Basic and Applied Fundamental Sciences, Higher Institute of Agriculture, Wood, Water and Environment, University of Ebolowa, Cameroon.

E-mail: [nanaoumaroubaba@gmail.com](mailto:nanaoumaroubaba@gmail.com)

Abstract

Objectives:
The aim of this study is to analyse the piezometric behaviour of the upstream catchment of the Benoue River, as part of the characterization of its aquifers.

Data description:
The data collected as part of this study are used to analyze the hydrodynamics of the aquifers in the basin studied. The methodology employed revolves around an analytical approach and initial processing, based on mathematical modeling of a global equation. This equation is used to estimate piezometric levels at different points in the basin, leading to a numerical representation of the distribution of groundwater bodies.

Objective

The aim of this study is to analyze the piezometric behavior of the upstream Benoue watershed. To this end, a mathematical equation was developed to determine the piezometric level at any given location. To do this, low-water piezometric data are taken into account. This approach is based on the assumption that the availability of water during low-water periods is a determining factor in its seasonal availability, barring the occurrence of extreme climatic conditions. This study is part of a wider research effort to characterize the soil aquifers of the Sahelian Sudan of the upstream Bénoué watershed. The publication of these data and the resulting research results marks the start of a series of works aimed at deepening our knowledge of this watershed. Previous research results have focused on the study of structural geology, without however exploiting relevant information from piezometry.

Data description

As part of the data acquisition process, piezometric data, including longitudes, latitudes and piezometric coasts, are determined by calculations that take into account the static levels of the structures and their topographic elevations. These data can reveal several specific pieces of information, including the direction of underground flow, the potential existence of piezometric domes, and the precise delimitation of the hydrogeological basin. The methodological approach followed for this study began with a field phase, consisting of geolocating the structures and measuring the static water level using a piezometer probe. This was followed by laboratory processing, involving the extraction of GPS data using specialized software such as BaseCamp, the preliminary processing of this data by deleting unnecessary data, and the integration of the piezometric coasts calculated for each structure.

**Table 1**: Overview of data files/data sets.

| **Label** | **Name of data file/data set** | **File types**  **(file extension)** | **Data repository and identifier (DOI or accession number)** |
| --- | --- | --- | --- |
| *H* | piezometric coastline | *MS Excel file (.xlsx)* | *Données (*[*file://APROSPEN/Donn%E9es*](file://APROSPEN/Donn%E9es)*)* |
| *Zp* | *Piezométric level* | *MS Excel file (.xlsx)* | *Données (*[*file://APROSPEN/Donn%E9es*](file://APROSPEN/Donn%E9es)*)* |
| *Zt* | *Topographic level* | *MS Excel file (.xlsx)* | *Données (*[*file://APROSPEN/Donn%E9es*](file://APROSPEN/Donn%E9es)*)* |
| *Zr* | *Reference level (thalweg base)* | *MS Excel file (.xlsx)* | *Données (*[*file://APROSPEN/Donn%E9es*](file://APROSPEN/Donn%E9es)*)* |
| *BD* | *Database* | *MS Excel file (.xlsx)* | *Données (*[*file://APROSPEN/Donn%E9es*](file://APROSPEN/Donn%E9es)*)* |

Limitations

The studies carried out revealed a random distribution of the works carried out, due to the dispersal of the populations concerned. This situation made it impossible to apply a regular data collection grid.

Abbreviations

Declarations

#### Acknowledgments

The author wishes to express his sincere gratitude to the editor, Pr Ewodo Mboudou Guillaume, and to Pr Bon André Firmin for their support, their observations and their scientific advice, which have enabled him to improve the quality of this work

**Funding** : This study is the fruit of research work carried out by the author of this study and a research team composed of additional people

**Author contributions**
*See* *the editorial policy section in the journal submission guidelines.*

**Competing interests**

#### Consent to publish *Yes*

**Data availability** 
The data described in this data note can be consulted free of charge at the following link: *(*[*file://APROSPEN/Donn%E9es*](file://APROSPEN/Donn%E9es)*)*

**Code availability**

References
